# Supplementary material
Source: publisher figshare collection journal article supplement (https://acs.figshare.com/ndownloader/files/12919838)
Supplement: Supplementary file 1 [file 12919838]

---

## Supporting Information

### **Wurtzite AlN(0001) Surface Oxidation: Hints from Ab Initio Calculations**

Zhi Fang,<sup>†</sup> Enhui Wang,<sup>†</sup> Yafeng Chen,<sup>†</sup> Xinmei Hou,<sup>\*,†</sup> Kuo-Chih Chou,<sup>†</sup>  
Weiyu Yang,<sup>§</sup> Junhong Chen,<sup>‡</sup> and Minghui Shang<sup>\*,§</sup>

<sup>†</sup> Collaborative Innovation Center of Steel Technology and <sup>‡</sup> School of Material Science and Technology, University of Science and Technology Beijing, Beijing 100083, China

<sup>§</sup> Institute of Materials, Ningbo University of Technology, Ningbo City 315016, China

\* Corresponding author. E-mail: [houxinmeiustb@ustb.edu.cn](mailto:houxinmeiustb@ustb.edu.cn); (X.H.), [smh2875@hotmail.com](mailto:smh2875@hotmail.com) (M.S.)

Tel/Fax: +86 10 6233 2570.

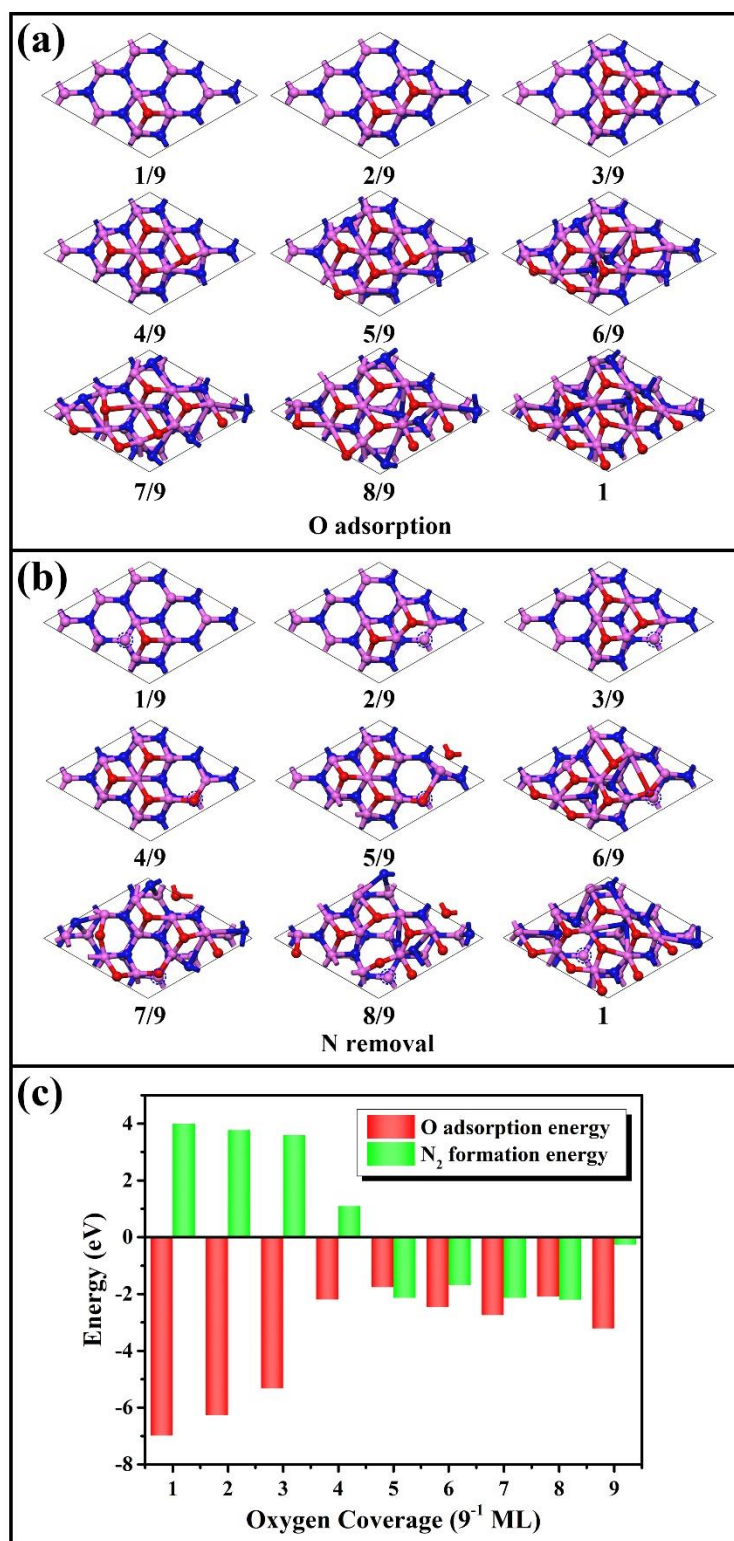

**Figure S1.** Optimized structures after (a) adsorption of O and (b) emission of N<sub>2</sub> at different oxygen coverages (ranging from 1/9 to 1). (c) Adsorption energies of O adsorption and formation energies of N<sub>2</sub> emission. Removed N atoms are labeled by dashed blue circles.

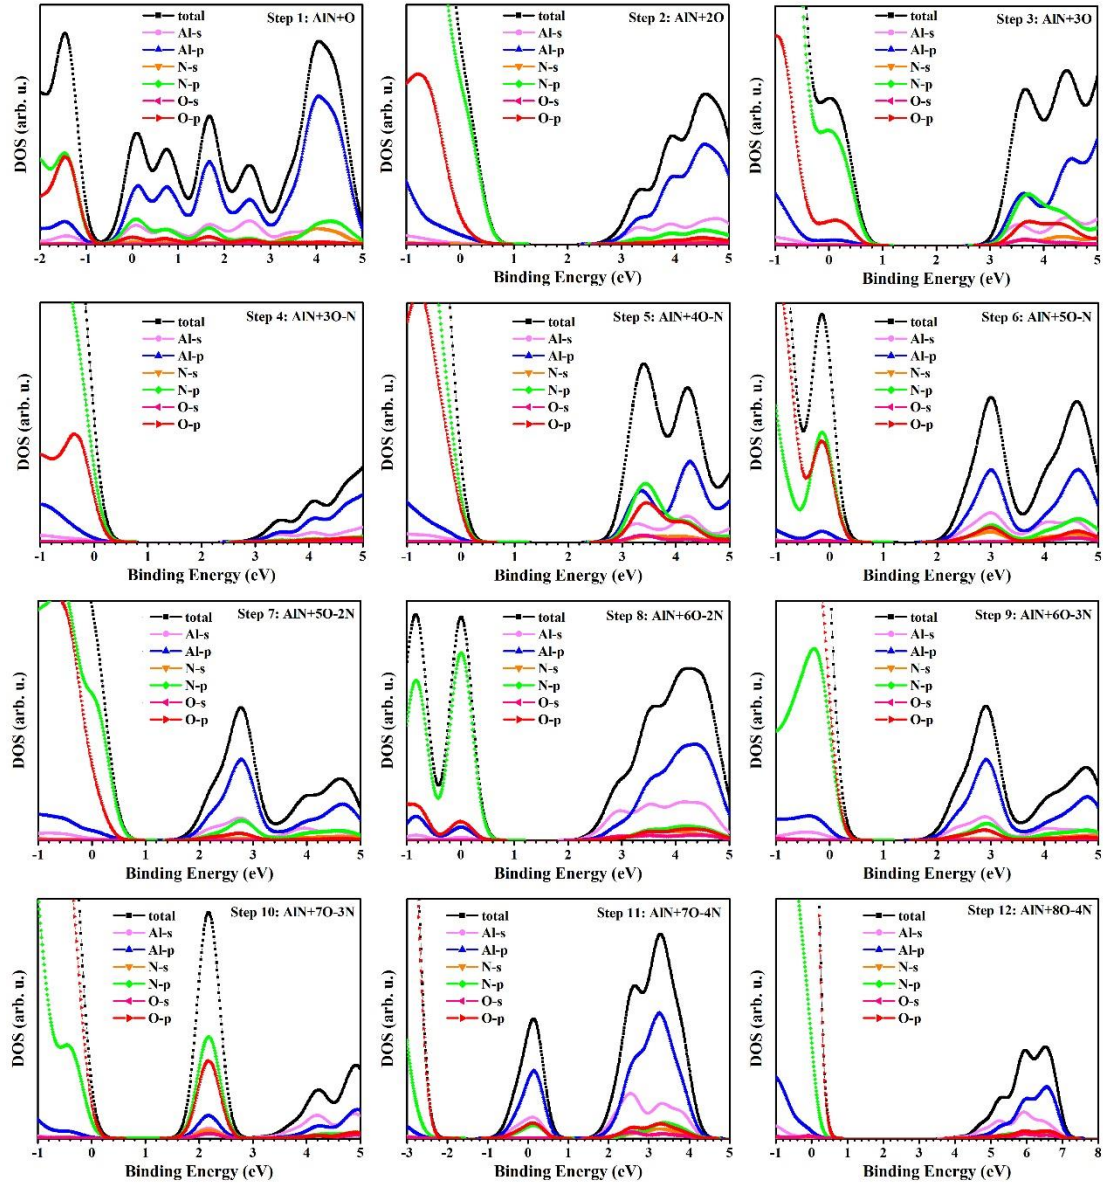

**Figure S2.** Total and partial density of states for *s* and *p* orbitals of each element on the AlN (0001) surface in every step of the oxidation process.

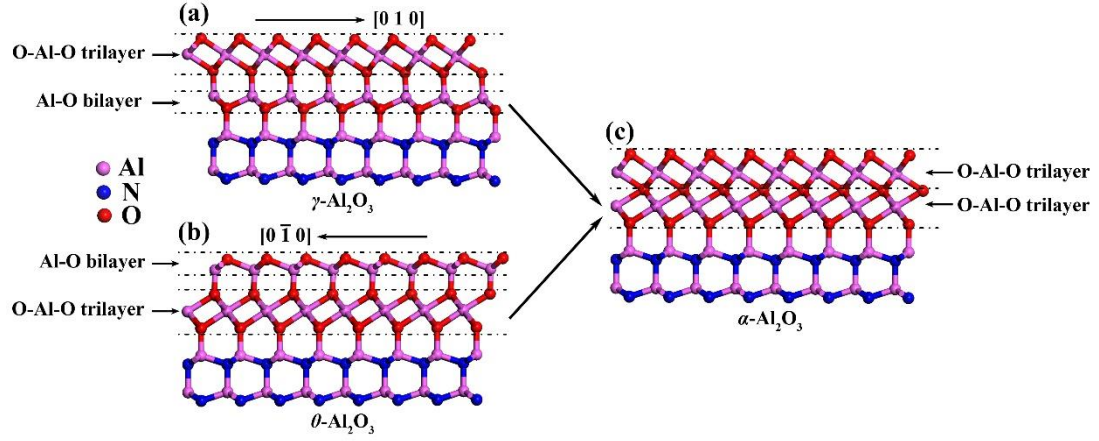

**Figure S3.** Models of the AlN surface with (a)  $\gamma$ -Al<sub>2</sub>O<sub>3</sub>-like (b)  $\theta$ -Al<sub>2</sub>O<sub>3</sub>-like and (c)  $\alpha$ -Al<sub>2</sub>O<sub>3</sub>-like oxide layers. Models a and c are simulated structures in our work and Model b is quoted from Reference 6.
